# Supplementary material
Source: PubMed Central journal article supplement (PMC3590106)
Supplement: NIHMS409239-supplement-1_si_001.pdf [file NIHMS409239-supplement-1_si_001.pdf]

**Supplementary Figures:**

**Endocytic uptake pathways utilized by CPMV nanoparticles**

Emily M. Plummer <sup>1,2#</sup> and Marianne Manchester <sup>1\*</sup>

<sup>1</sup>Skaggs School of Pharmacy and Pharmaceutical Sciences  
University of California, San Diego, La Jolla, CA 92093 USA

<sup>2</sup>Kellogg School of Science and Technology,  
The Scripps Research Institute, La Jolla, CA 92037 USA

\*Corresponding author:

MC0749

9500 Gilman Drive

La Jolla, CA 92093

[mmanchester@ucsd.edu](mailto:mmanchester@ucsd.edu)

#Current address:

La Jolla Institute for Allergy and Immunology

9420 Athena Circle

La Jolla, CA 92037

Tel 858.752.6500

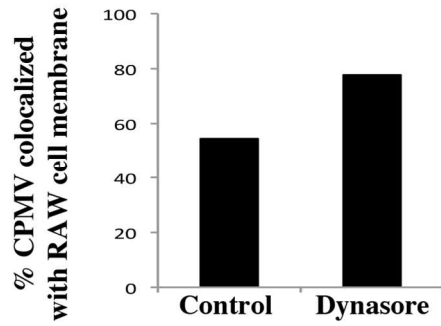

**Supplementary Figure 1: Dynamin inhibition enhances colocalization of CPMV with RAW264.7 macrophages plasma membrane.** RAW264.7 macrophages were exposed to dynasore for 30 minutes prior to addition of CPMV. After 1 hour, cells were fixed and imaged by confocal microscopy. Levels of colocalization were determined using Image J.
